# Supplementary material for: Transcriptome Analysis Reveals Genetic Factors Related to Callus Induction in Barley
Source: MDPI journal article supplement (doi:10.3390/agronomy12030749), 2022-03-21
Supplement: s1 [file s1]

## Supplementary materials

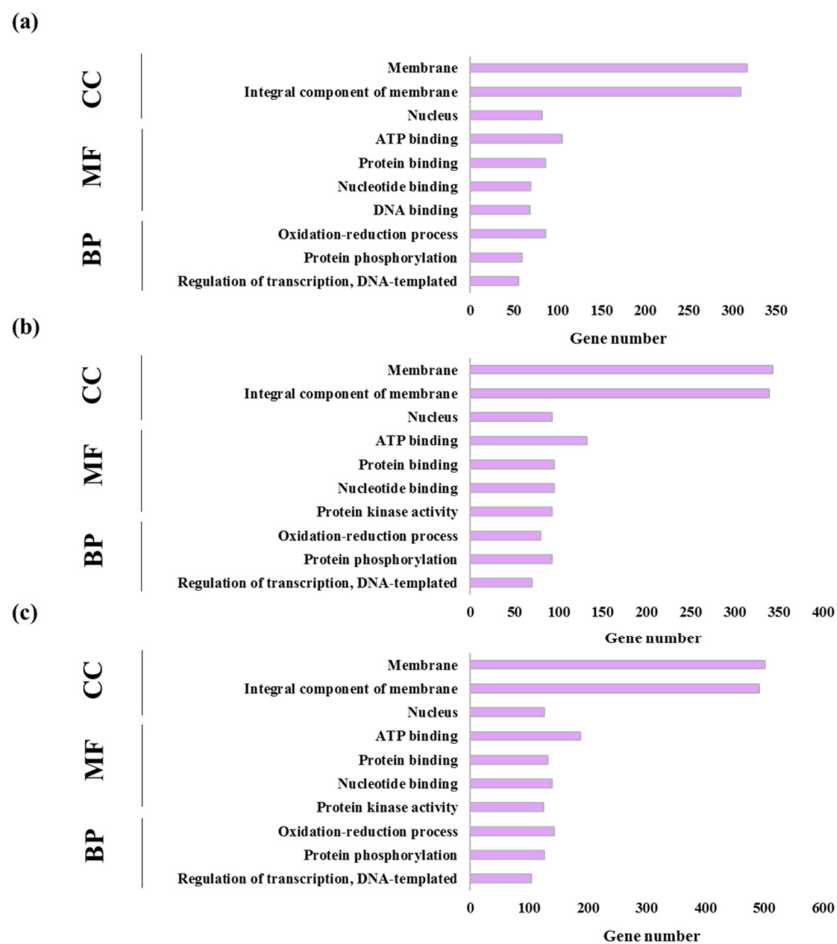

**Figure S1.** Top 10 Gene Ontology (GO) categories of DEGs in different groups. (a) GP-Specific DEGs. (b) ZU9-Specific DEGs. (c) Overlapped genes. 'BP', 'MF' and 'CC' represent biological process, molecular function and cell component, respectively.

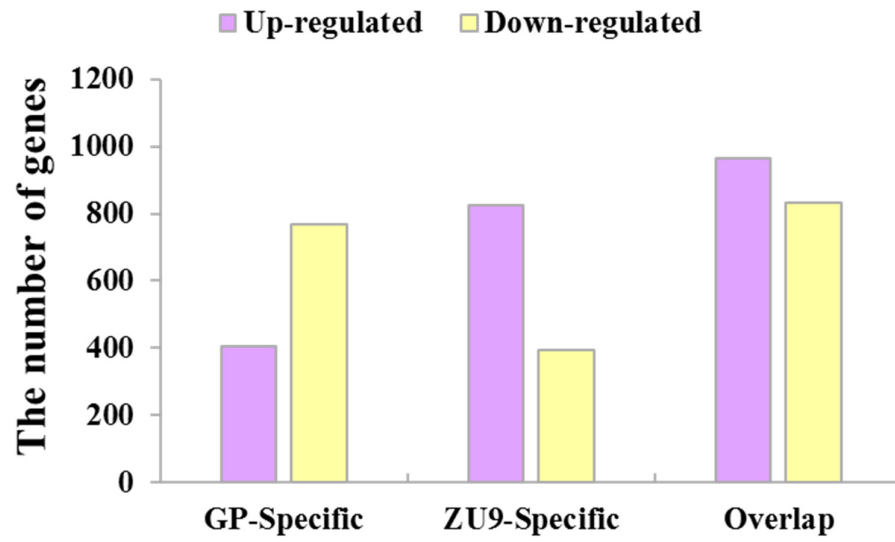

**Figure S2.** The number of up- and down-regulated genes in three groups (GP-Specific, ZU9-Specific and Overlap)
